# Supplementary material for: Hydrolytic degradation of PEG-based thiol–norbornene hydrogels enables multi-modal controlled release
Source: Royal Society of Chemistry journal article supplement (doi:10.1039/d5tb01524c), 2025-01-01
Supplement: d5tb01524c1.pdf [file d5tb01524c1.pdf]

## **Supplementary Information**

### **Tuning hydrolytic degradation of PEG-based thiol-norbornene hydrogels for multi-modal controlled release**

Nathan H. Dimmitt and Chien-Chi Lin\*

Weldon School of Biomedical Engineering, Purdue University, West Lafayette, IN, USA

\* To whom correspondence should be sent:

Chien-Chi Lin, Ph.D.  
Professor of Biomedical Engineering  
Weldon School of Biomedical Engineering  
Purdue University  
206 Martin Jischke Dr. West Lafayette, IN, 47907

Contact Information:  
Phone: (965) 495-7791  
Emails: [lin711@purdue.edu](mailto:lin711@purdue.edu)

## Supporting methods

### Characterization of PEGNB<sub>CA</sub> or PEGNB thiol-norbornene hydrogels:

To obtain gel fractions of the different hydrogel formulations, PEGNB and PEGNB<sub>CA</sub> along with the thiol crosslinker were prepared in water when for PEG4SH and PEG8SH; however, crosslinking was unable to occur when the macromers were prepared in water for DTT. For this reason, we calculated the theoretical initial mass based upon the polymer wt% of the hydrogel when crosslinked with DTT. After crosslinking, the hydrogels were dried en vacuo for at least one day. Once dried, the mass of the hydrogel was measured to obtain ( $W_1$ ). The hydrogels were then swelled in DDH<sub>2</sub>O overnight to remove unreacted macromer from the hydrogel system. The hydrogels were then dried again and the mass was measured to obtain ( $W_2$ ). Gel fraction was calculated from using the following equation.

$$Gel\ Fraction = \frac{W_2}{W_1} \quad (1)$$

Utilizing the mass swelling ratio as defined in the main paper, the average mesh size of thiol-norbornene click hydrogels were derived. The polymer volume fraction ( $v_{2,s}$ ) was calculated using the following equation.

$$v_{2,s} = \frac{1}{Q} = \frac{1/\rho_{H_2O}}{\left[ \left( Q_m / \rho_{PEG} \right) + \left( 1 / \rho_{H_2O} \right) \right]} \quad (2)$$

where Q is the volumetric swelling ratio. Since the hydrogel is in a highly swollen state, the volumetric swelling ratio can be estimated as the mass swelling ratio.  $\rho_{H_2O}$  is the density of water (0.994 g cm<sup>-3</sup>) and  $\rho_{PEG}$  is the density of PEG (1.087 g cm<sup>-2</sup>). From the calculated polymer volume

fraction, the number average molecular weight between crosslinks ( $M_c$ ) was obtained using the Flory-Rehner equation.

$$\frac{1}{M_c} = \frac{2}{M_n} - \frac{(\bar{v}/V_1)[\ln(1 - v_{2,s}) + v_{2,s} + \chi_{1,2}v_{2,s}^2]}{\left(v_{2,s}^{1/3} - (2/\phi)v_{2,s}\right)} \quad (3)$$

where  $M_n$  is the number average of molecular weight of polymer,  $\chi_{1,2}$  is the polymer-water interaction parameter (i.e., PEG in water = 0.426,  $V_1$  is the molar volume solvent (i.e., water = 18.0 cm<sup>3</sup>/mol),  $\bar{v}$  is the specific volume of PEG (i.e., 0.83494 cm<sup>3</sup>/g) [1], and  $\phi$  is the functionality of the crosslinker (i.e., 2 for DTT, 4 for PEG4SH, and 8 for PEG8SH, PEGNB, or PEGNB<sub>CA</sub>). After average molecular weight between crosslinks was obtained, the average mesh size ( $\xi$ ) was calculated using the following equation.

$$\xi = v_{2,s}^{-1/3}(\bar{r}_0^2)^{1/2} \quad (4)$$

where  $(\bar{r}_0^2)^{1/2}$  is the root-mean-squared end-to-end distance of network chains in the unperturbed state (solvent free) and is defined as:

$$(\bar{r}_0^2)^{1/2} = l \left( 3 \frac{M_c}{M_r} \right)^{1/2} C_n^{1/2} \quad (5)$$

where  $l$  is the bond length (i.e., 0.146 nm for PEG),  $M_r$  is the molecular weight of polymer repeating unit (i.e., 44 g/mol for PEG),  $C_n$  is the characteristic ratio for the polymer (i.e., 4 for PEG) [2].

## Supporting figures

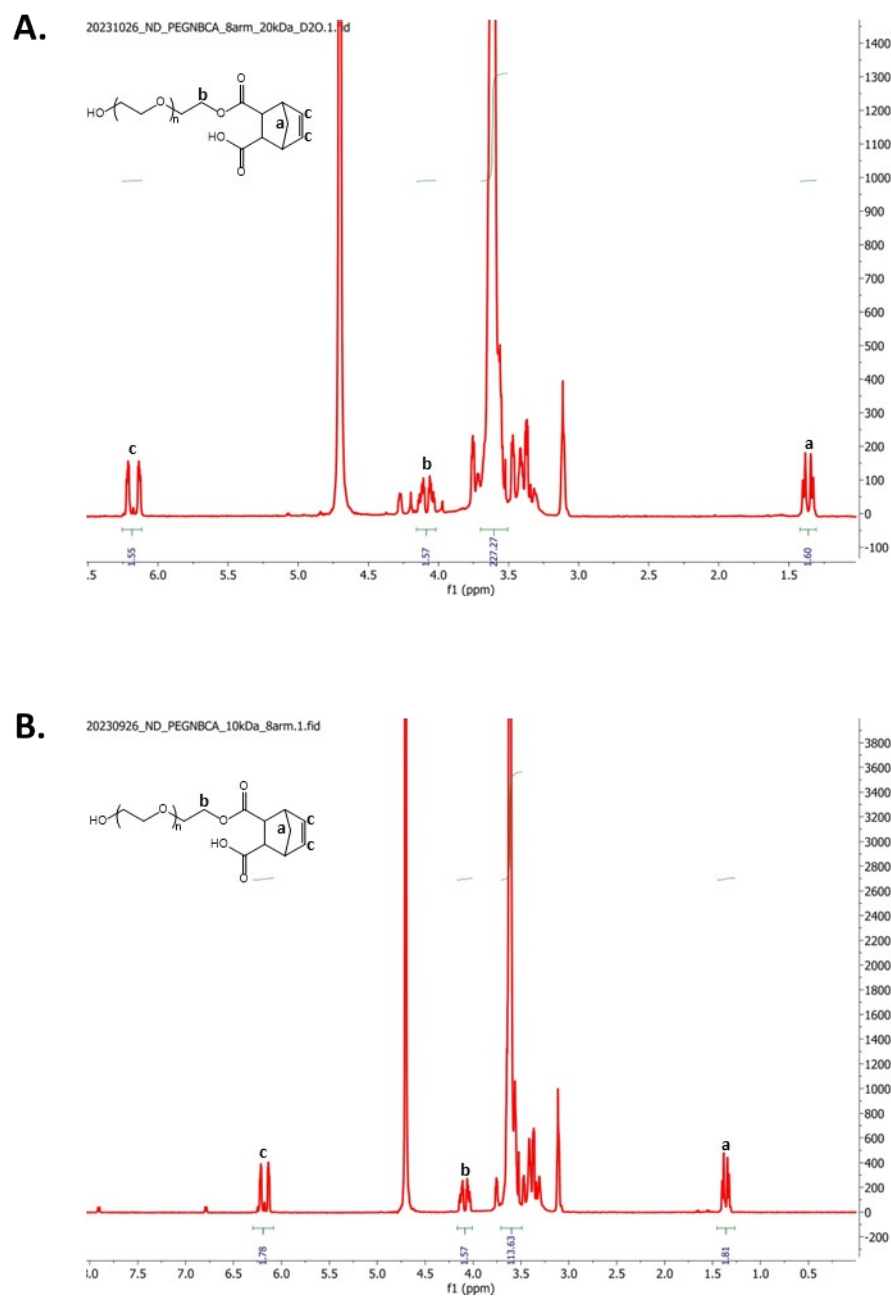

**Figure S1.** <sup>1</sup>H spectra of (A) PEGNB<sub>CA</sub> (8-arm, 10 kDa) and (B) PEGNB<sub>CA</sub> (8-arm, 20 kDa) in deuterium oxide using a Bruker Avance III 500 MHz NMR.

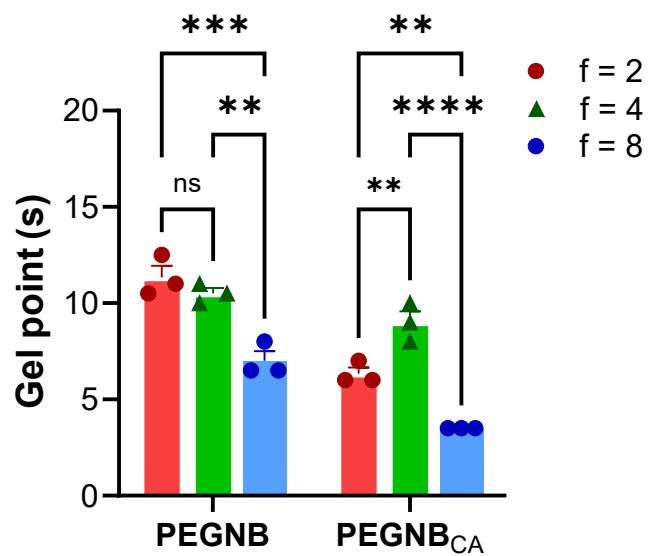

**Figure S2.** Gel points determined by *in situ* rheology of 5 wt% PEGNB or PEGNB<sub>CA</sub> (8-arm, 20 kDa) hydrogels crosslinked with thiol crosslinkers with different functionalities at R=1 with 2 mM LAP at 2 mW/cm<sup>2</sup> light intensity.

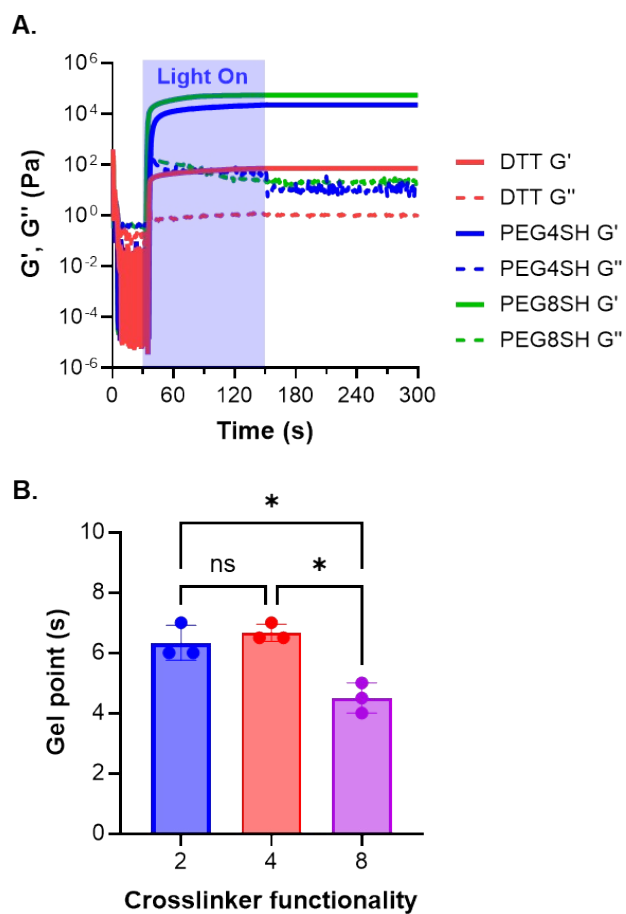

**Figure S3.** (A) *In situ* photorheometry of 5 wt% PEGNB<sub>CA</sub> (8-arm, 10 kDa) crosslinked with thiol crosslinkers with different functionalities at R=1 with 2 mM LAP at 2 mW/cm<sup>2</sup> light intensity. (B) Gel points identified from the *in situ* photorheometry plot.

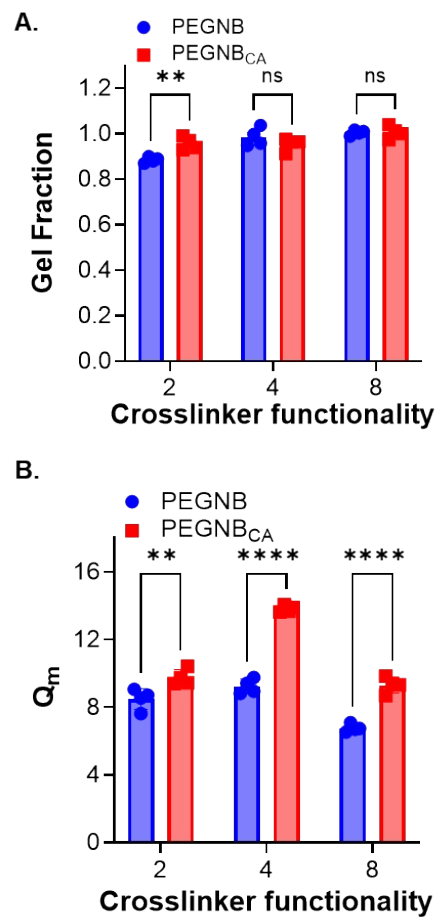

**Figure S4.** (A) Gel fraction or (B) mass swelling ratio of 10 wt% PEGNB or PEGNB<sub>CA</sub> (8-arm, 20 kDa) hydrogels crosslinked with PEG8SH at R=1.

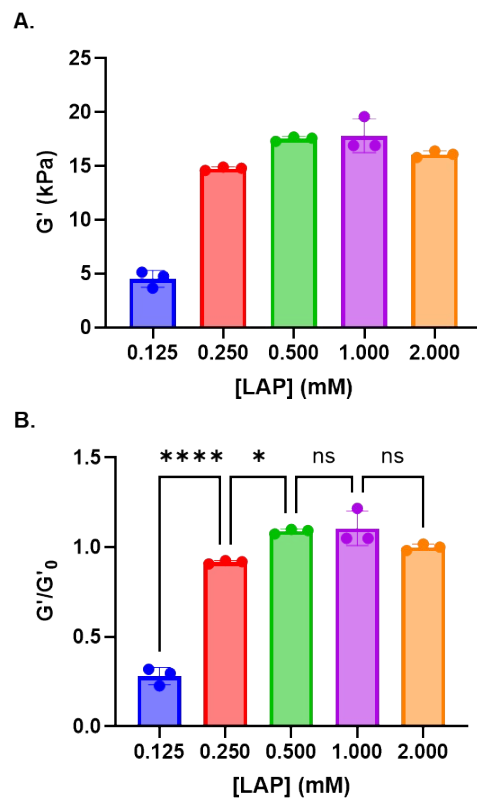

**Figure S5.** (A) Actual and (B) normalized elastic shear moduli of 5 wt% PEGNB<sub>CA</sub> (8-arm, 20 kDa) hydrogels crosslinked with PEG4SH at R=1. Values were normalized to the average G' of hydrogels crosslinked with 2 mM LAP.



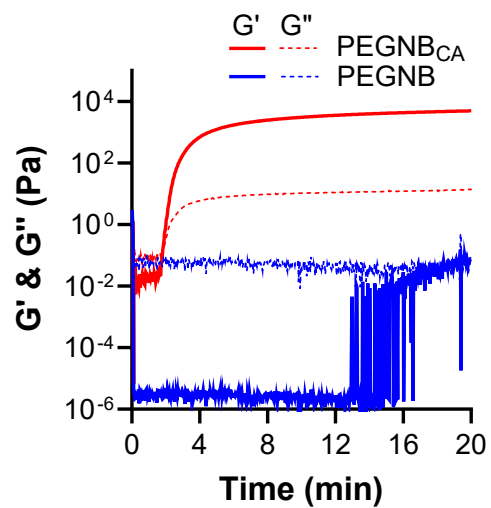

**Figure S6.** *In situ* rheometry of HRP-mediated crosslinking of 5 wt% PEGNB or PEGNB<sub>CA</sub> (8-arm, 20 kDa) with PEG8SH (R=1) and 0.5 kU/mL HRP in the absence of H<sub>2</sub>O<sub>2</sub>.

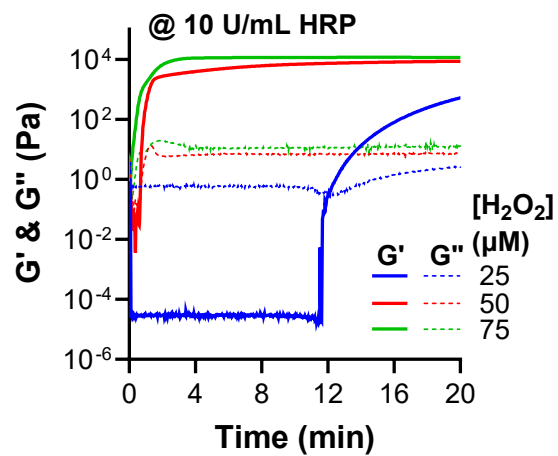

**Figure S7.** *In situ* rheometry of HRP-mediated crosslinking of 5 wt% PEGNB<sub>CA</sub> crosslinked with PEG8SH (R=1) and 10 U/mL HRP at different concentrations of  $H_2O_2$ .

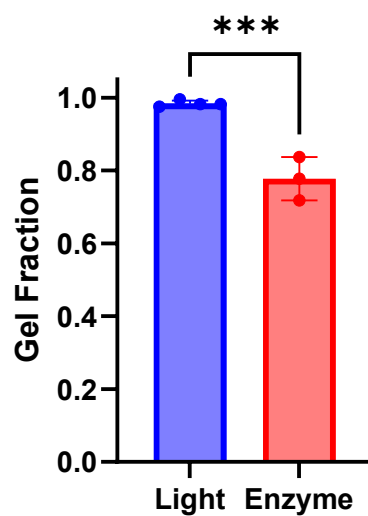

**Figure S8.** Gel fraction of 10 wt% PEGNB<sub>CA</sub> (8-arm, 20 kDa) hydrogels crosslinked with PEG8SH at R=1 through enzymatic (20 U/mL HRP) or light-mediated crosslinking (2 mM LAP, 20 mW/cm<sup>2</sup> at 365 nm).

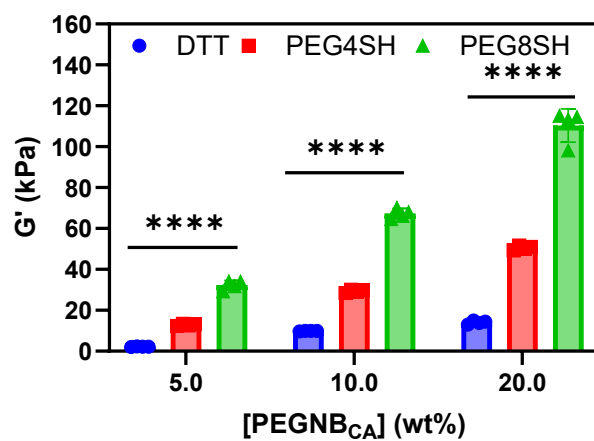

**Figure S9.** Initial elastic shear moduli of PEGNB<sub>CA</sub> (8-arm, 20 kDa) hydrogels at different macromer content crosslinked with different thiol crosslinkers at R=1.

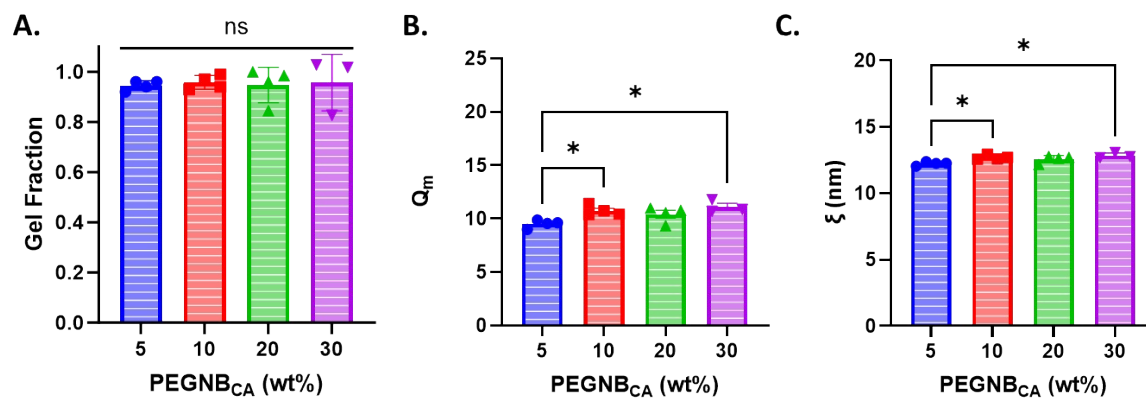

**Figure S10.** (A) Gel fraction, (B) mass swelling ratio, and (C) mesh size of PEGNB<sub>CA</sub> (8-arm, 20 kDa) hydrogels crosslinked by DTT.

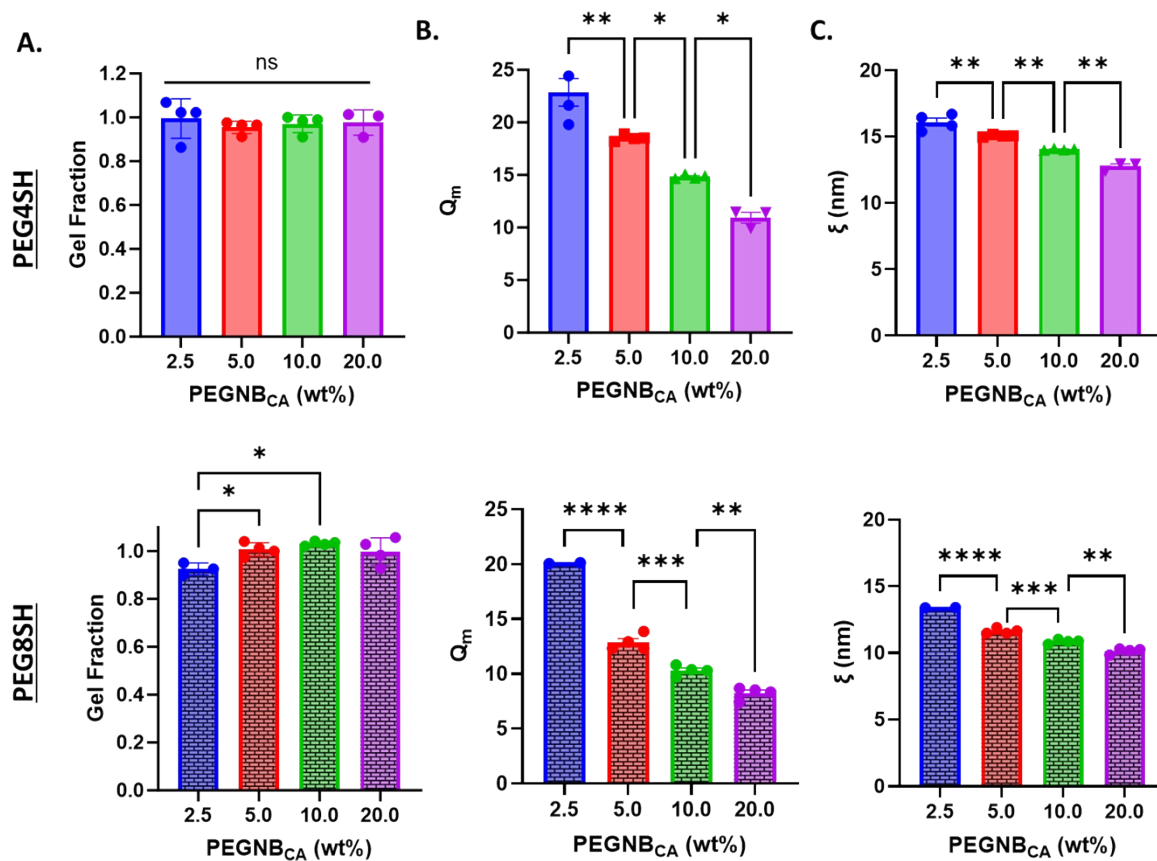

**Figure S11.** (A) Gel fraction, (B) mass swelling ratio, and (C) mesh size of PEGNB<sub>CA</sub> (8-arm, 20 kDa) hydrogels crosslinked by PEG4SH (top row) or PEG8SH (bottom row).

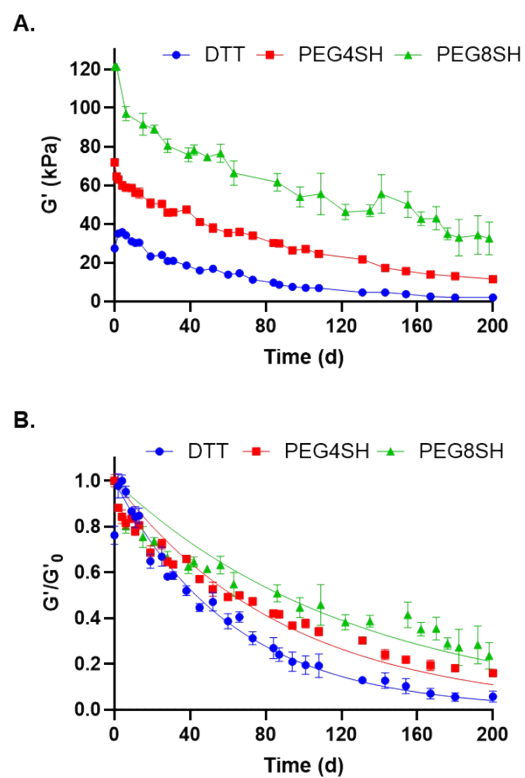

**Figure S12.** Changes in (A) elastic shear moduli and (B) normalized elastic shear moduli over time of 10 wt% PEGNB (8-arm, 20 kDa) hydrogels crosslinked with different thiol crosslinkers.

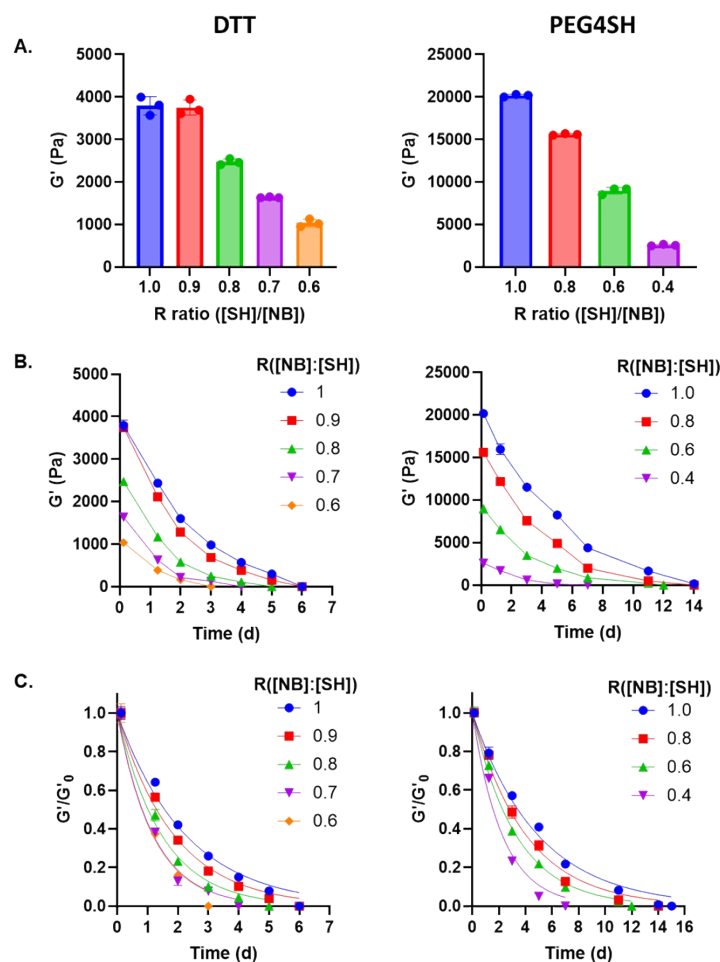

**Figure S13.** Effect of R ratio on hydrolytic degradation. (A-B) Initial elastic shear moduli of 5 wt% PEGNB<sub>CA</sub> (8-arm, 20 kDa) crosslinked with (A) DTT or (B) PEG4SH at different R ratios. (B-C) Changes in (B) actual or (C) normalized elastic shear moduli overtime for 5 wt% PEGNB<sub>CA</sub> (8-arm, 20 kDa) crosslinked with DTT or PEG4SH at different R ratios.



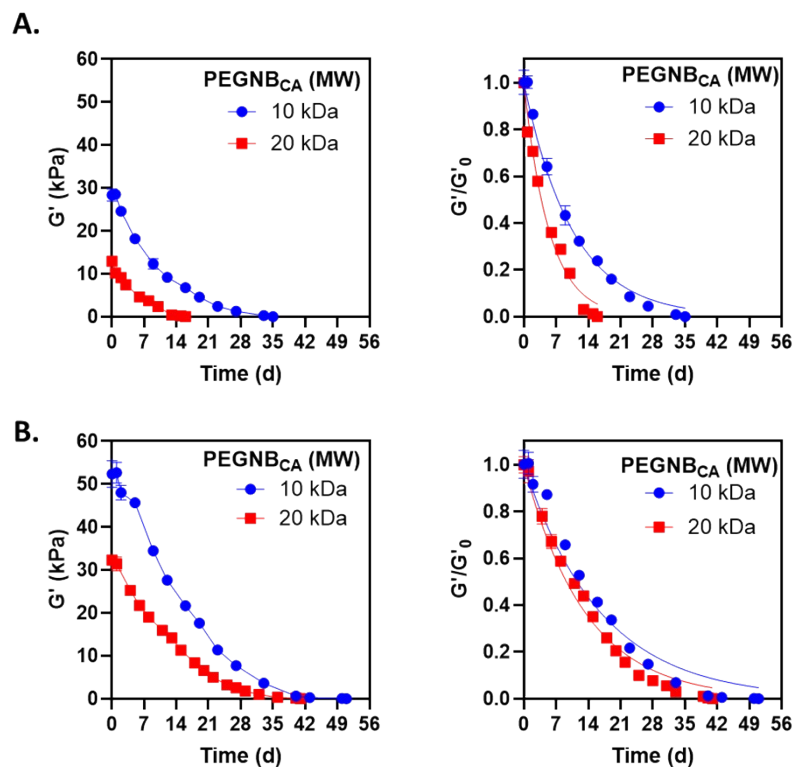

**Figure S14.** Effect of molecular weight of PEGNB<sub>CA</sub> on hydrolytic degradation. (A-B) Changes in elastic shear moduli and normalized elastic shear moduli over time of 5 wt% PEGNB<sub>CA</sub> (8-arm, 10 kDa or 20 kDa) crosslinked with (A) PEG4SH or (B) PEG8SH at R=1.

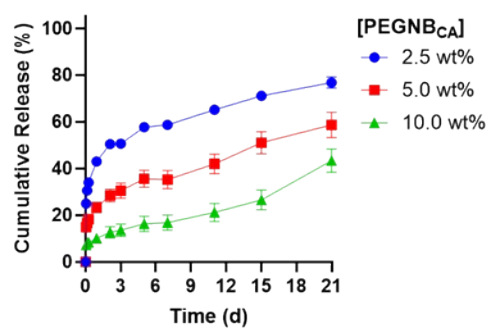

**Figure S15.** Release of 70 kDa FITC-Dextran from PEGNB<sub>CA</sub> (8-arm, 10 kDa) hydrogels crosslinked with PEG8SH at R=1.

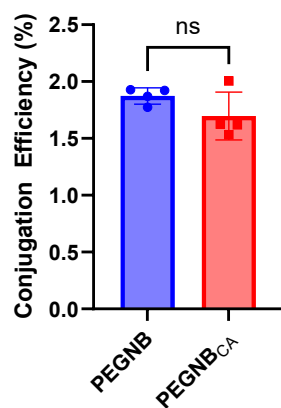

**Figure S16.** Conjugation efficiency of PEG-fluorescein-thiol (3.4 kDa) onto 10 wt% PEGNB or PEGNB<sub>CA</sub> crosslinked with PEG8SH at R=0.8.

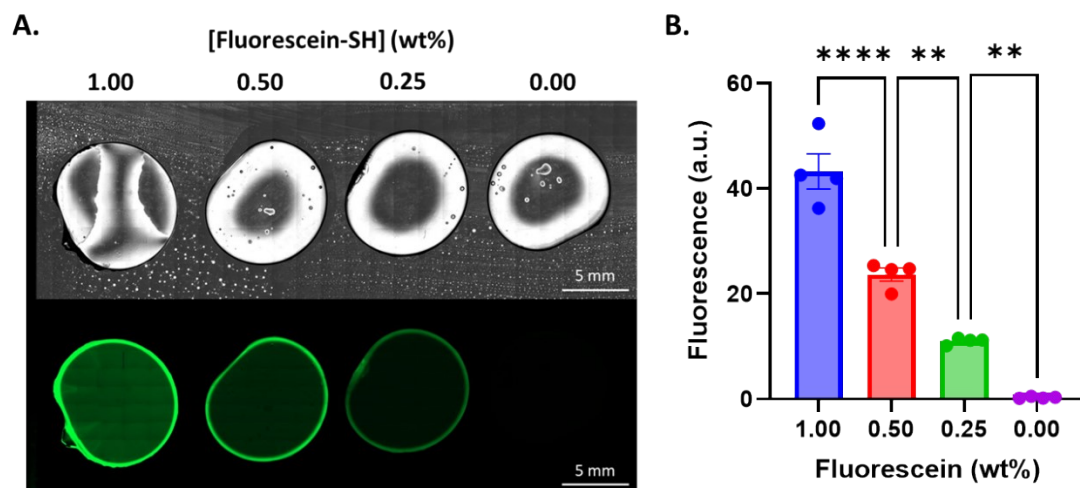

**Figure S17.** (A) Brightfield and fluorescent imaging (BioTek Lionheart microscope) of PEGNB<sub>CA</sub> (8-arm, 10 kDa) of 10 wt% PEGNB<sub>CA</sub> crosslinked with PEG8SH at R=0.8 with different concentrations of PEG-fluorescein-thiol (3.4 kDa). (B) Calculated fluorescent intensity from images of hydrogels.

### Supporting tables

**Table S1.** Derived values from one-phase decay fitting of changes in normalized  $G'$  of 5 wt% PEGNB (8-arm, 20 kDa) hydrogels crosslinked with PEG4SH at  $R=1$  when incubated at different pH buffers.

| pH  | $k_{\text{hydrolysis}} \text{ (d}^{-1}\text{)}$<br>95% CI | $R^2$  |
|-----|-----------------------------------------------------------|--------|
| 3   | 0.01755<br>(0.01456 to 0.02072)                           | 0.8332 |
| 7.4 | 0.01636<br>(0.01500 to 0.01775)                           | 0.9369 |
| 12  | 195.3<br>(144.6 to N/a)                                   | 0.9976 |

**Table S2.** Derived values from one-phase decay fitting of changes in normalized  $G'$  of 5 wt% PEGNB<sub>CA</sub> (8-arm, 20 kDa) hydrogels crosslinked with PEG4SH at  $R=1$  when incubated at different pH buffers.

| pH  | $k_{\text{hydrolysis}} \text{ (d}^{-1}\text{)}$<br>95% CI | $R^2$  |
|-----|-----------------------------------------------------------|--------|
| 3   | 0.1459<br>(0.1304 to 0.1639)                              | 0.9683 |
| 7.4 | 0.1501<br>(0.1422 to 0.1587)                              | 0.9925 |
| 12  | 0.1732<br>(0.1590 to 0.1891)                              | 0.9846 |

**Table S3.** Derived values from one-phase decay fitting of changes in normalized  $G'$  of 5 wt% PEGNB<sub>CA</sub> (8-arm, 20 kDa) hydrogels crosslinked with PEG4SH at R=1 when incubated at different temperatures.

| Temperature (°C) | $k_{\text{hydrolysis}}$ (d <sup>-1</sup> )<br>95% CI | R <sup>2</sup> |
|------------------|------------------------------------------------------|----------------|
| 25               | 0.01395<br>(0.01314 to 0.01494)                      | 0.9419         |
| 37               | 0.1501<br>(0.1421 to 0.1587)                         | 0.9925         |

**Table S4.** Derived values from one-phase decay fitting of changes in normalized  $G'$  of 10 wt% PEGNB<sub>CA</sub> (8-arm, 20 kDa) hydrogels crosslinked either enzymatically or through light-initiated polymerization with PEG8SH at R=1.

| Crosslinking Method | $k_{\text{hydrolysis}}$ (d <sup>-1</sup> )<br>95% CI | R <sup>2</sup> |
|---------------------|------------------------------------------------------|----------------|
| Light               | 0.08578<br>(0.08337 to 0.08829)                      | 0.9911         |
| Enzymatic           | 0.08243<br>(0.07701 to 0.08836)                      | 0.9773         |

**Table S5.** Derived values from one-phase decay fitting of changes in normalized  $G'$  of PEGNB<sub>CA</sub> (8-arm, 20 kDa) hydrogels crosslinked with different thiol crosslinkers at different macromer content.

| <b>[Macromer] (wt%)-<br/>Thiol Crosslinker</b> | <b><math>k_{\text{hydrolysis}}</math> (d<sup>-1</sup>)<br/>95% CI</b> | <b>R<sup>2</sup></b> |
|------------------------------------------------|-----------------------------------------------------------------------|----------------------|
| 5 wt%-DTT                                      | 0.3874<br>(0.3483 to 0.4315)                                          | 0.9610               |
| 5 wt%-PEG4SH                                   | 0.1812<br>(0.1717 to 0.1913)                                          | 0.9841               |
| 5 wt%-PEG8SH                                   | 0.07567<br>(0.07228 to 0.07928)                                       | 0.9718               |
| 10 wt%-DTT                                     | 0.3565<br>(0.3366 to 0.3779)                                          | 0.9864               |
| 10 wt%-PEG4SH                                  | 0.1817<br>(0.1713 to 0.1930)                                          | 0.9830               |
| 10 wt%-PEG8SH                                  | 0.08578<br>(0.08337 to 0.08829)                                       | 0.9911               |
| 20 wt%-DTT                                     | 0.3005<br>(0.2792 to 0.3240)                                          | 0.9821               |
| 20 wt%-PEG4SH                                  | 0.1557<br>(0.1463 to 0.1659)                                          | 0.9789               |
| 20 wt%-PEG8SH                                  | 0.08477<br>(0.8136 to 0.08838)                                        | 0.9824               |

**References:**

1. Y. Liu, R. Lipowsky and R. Dimova, *Langmuir*, 2012, **28**, 3831-3839.
2. C.-C. Lin and A. T. Metters, *Advanced drug delivery reviews*, 2006, **58**, 1379-1408.
